# Supplementary material for: Relative genomic impacts of translocation history, hatchery practices, and farm selection in Pacific oyster Crassostrea gigas throughout the Northern Hemisphere
Source: PubMed Central journal article supplement (PMC7359842; doi:10.1111/eva.12965), 2020-04-17

# Projection onto PC1 and PC2

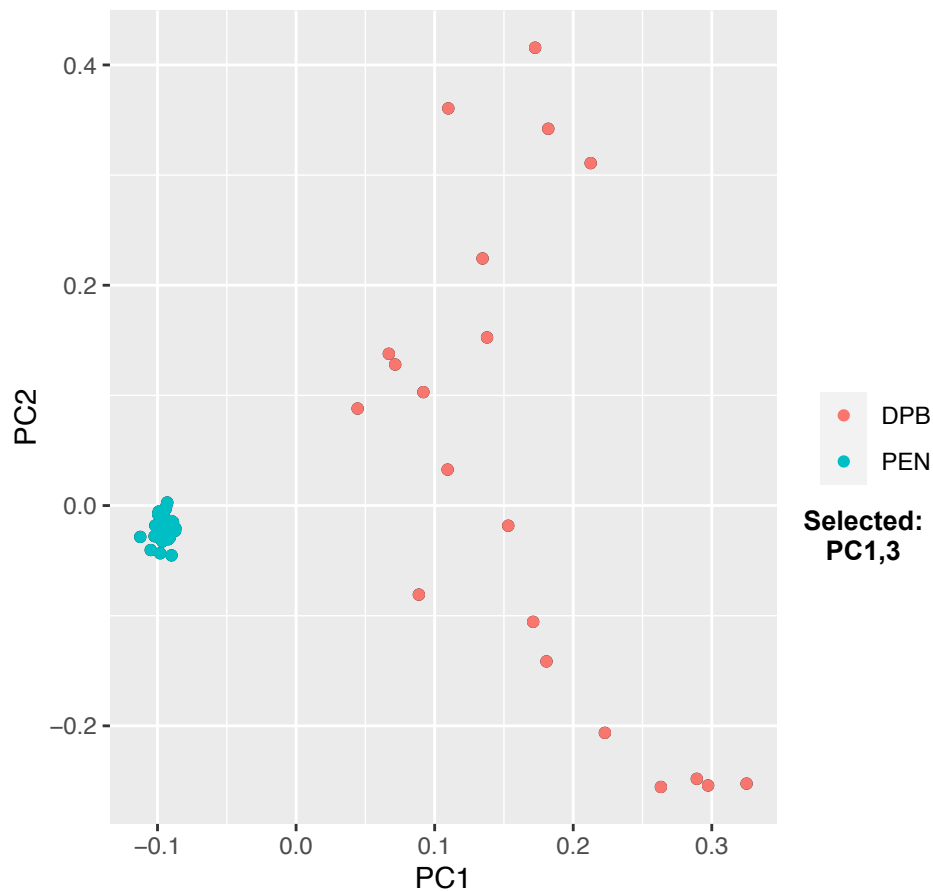

# Projection onto PC3 and PC4

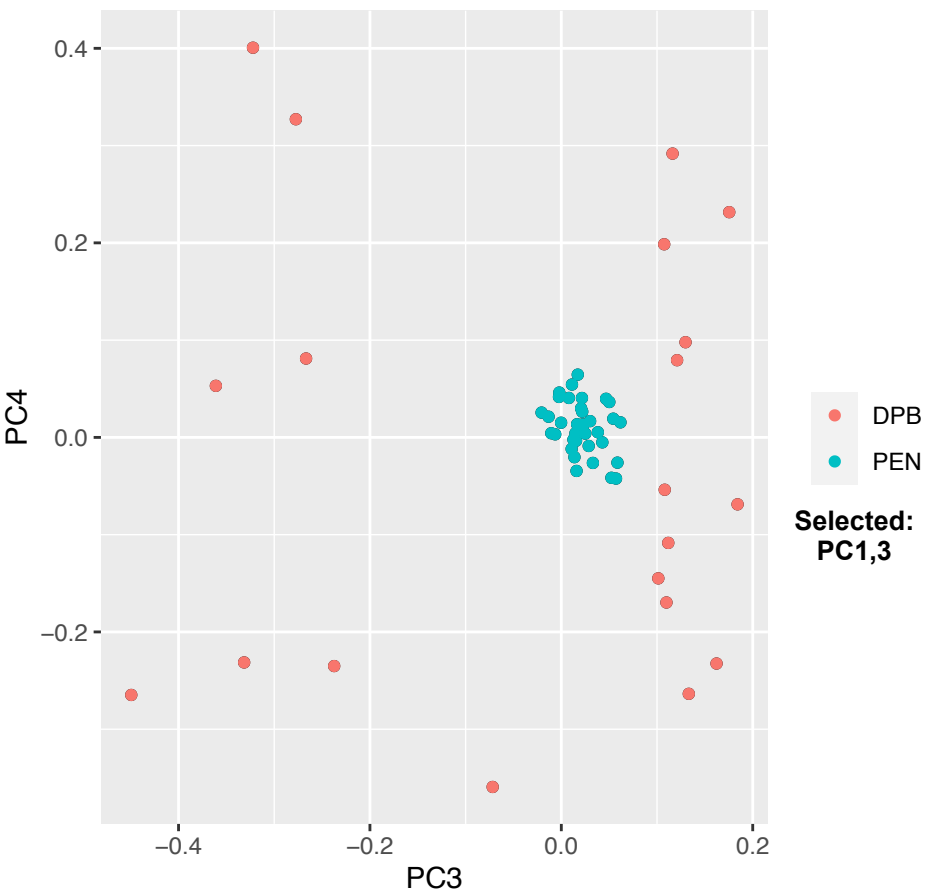

# Projection onto PC1 and PC2

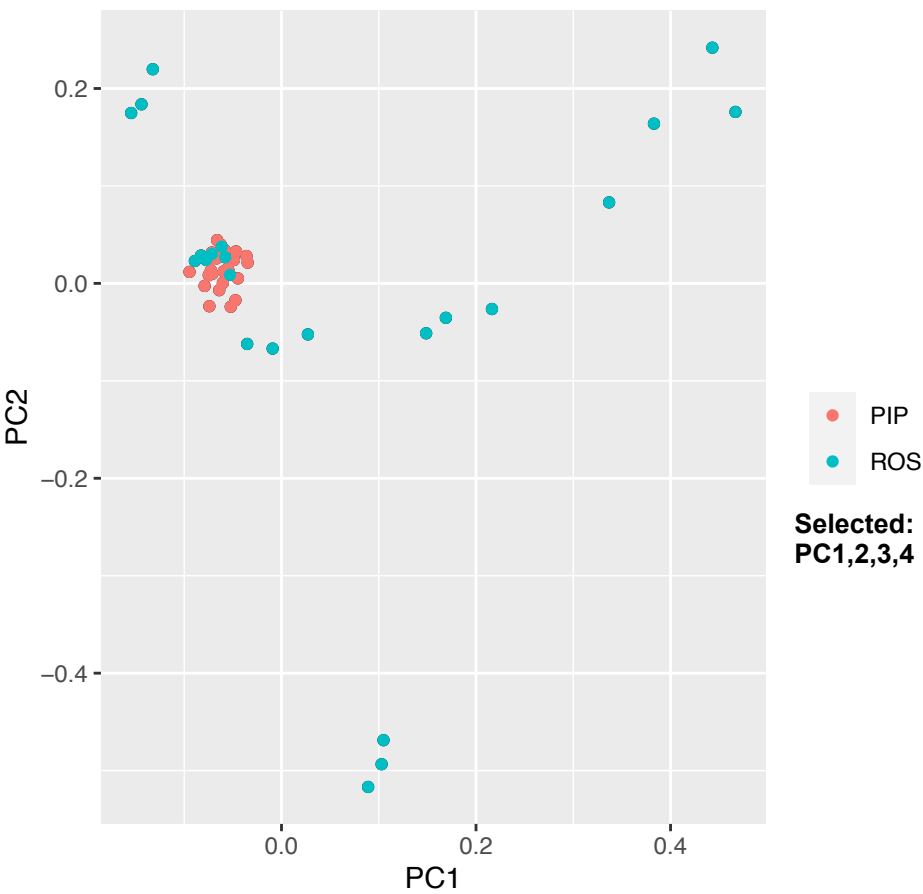

# Projection onto PC3 and PC4

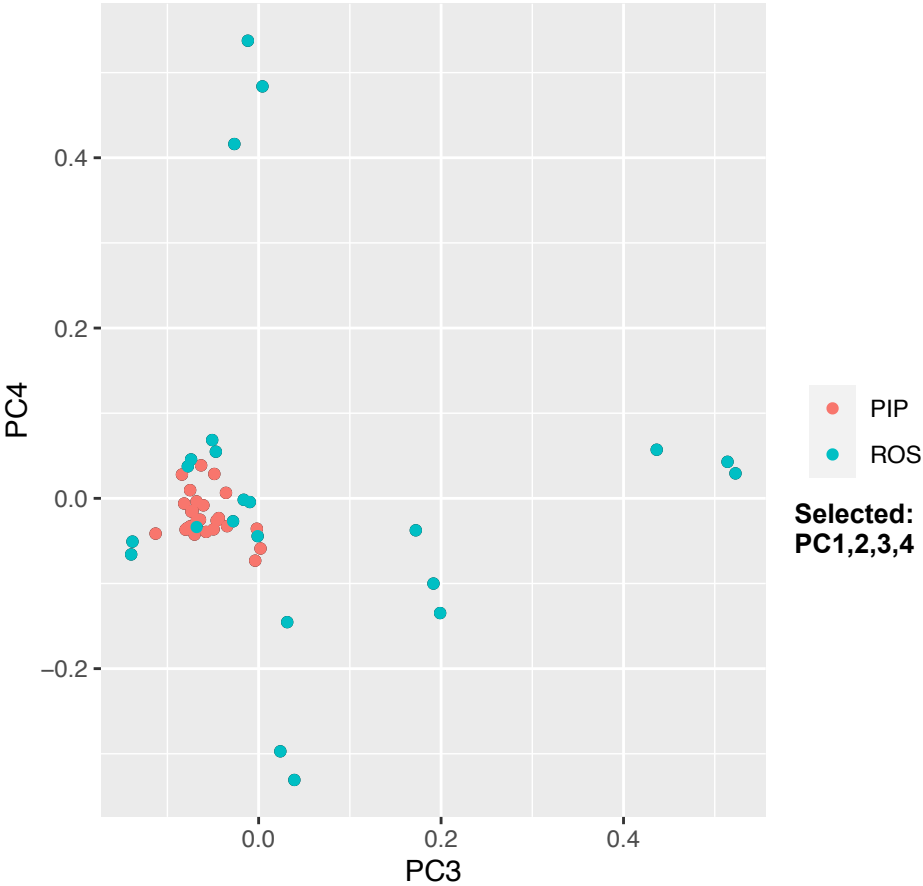

# Projection onto PC5 and PC6

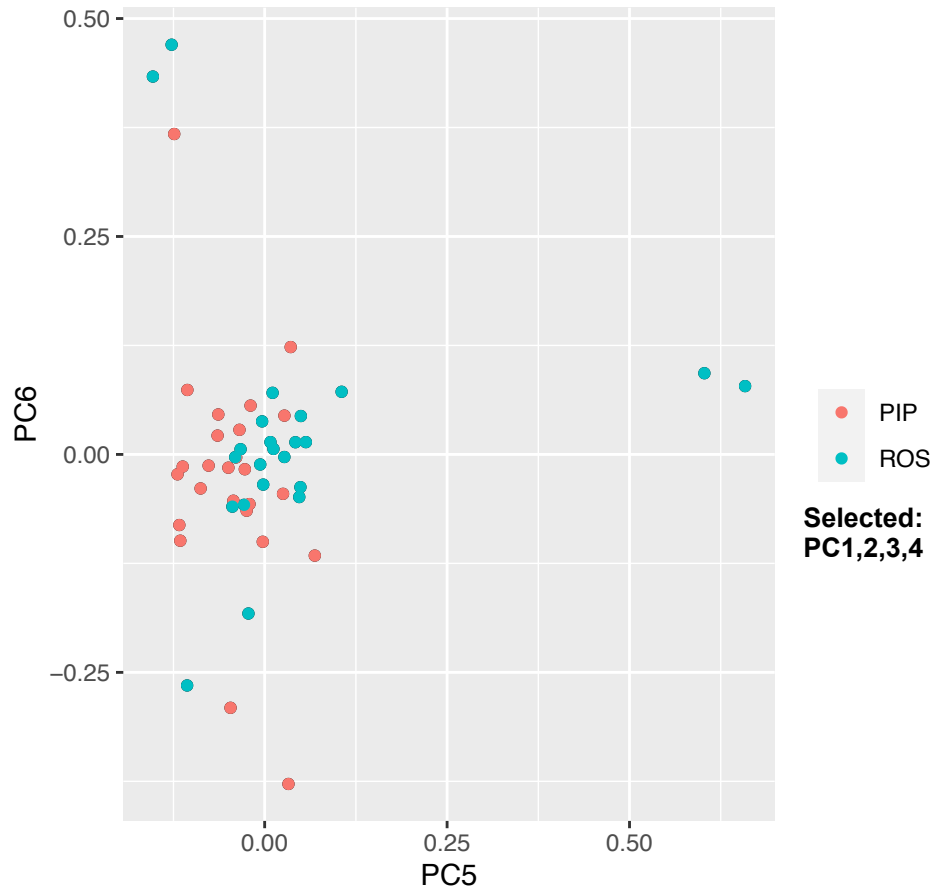

# Projection onto PC1 and PC2

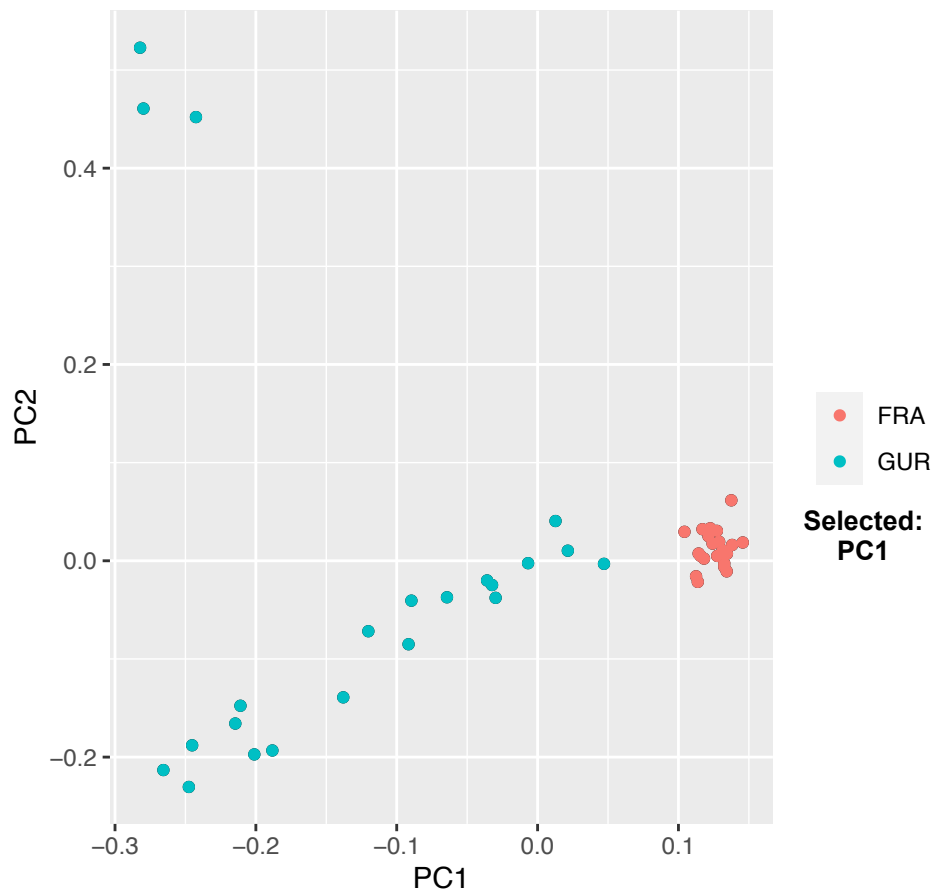

# Projection onto PC3 and PC4

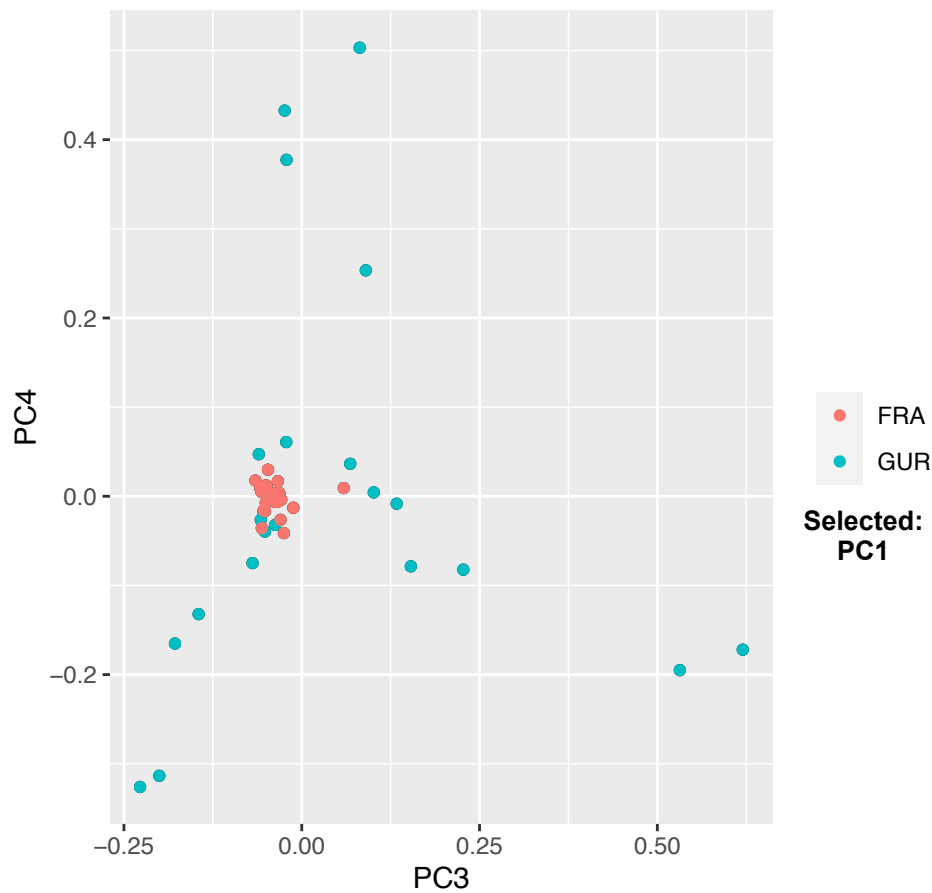

# Projection onto PC5 and PC6

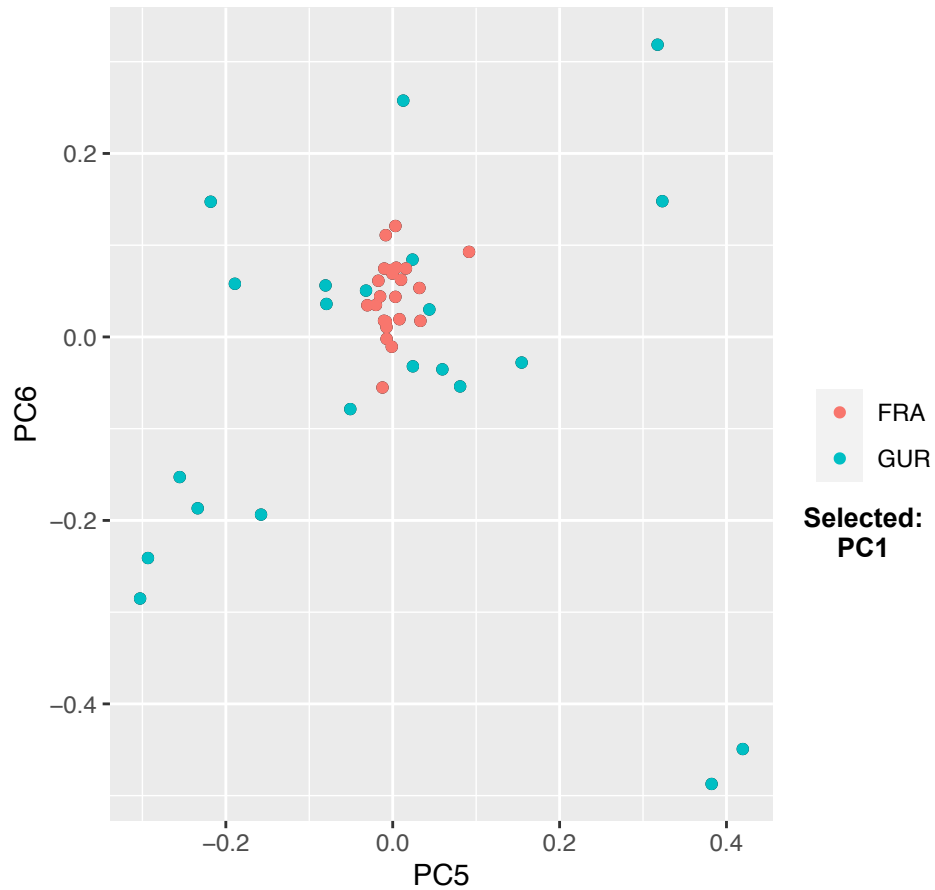



# Projection onto PC1 and PC2

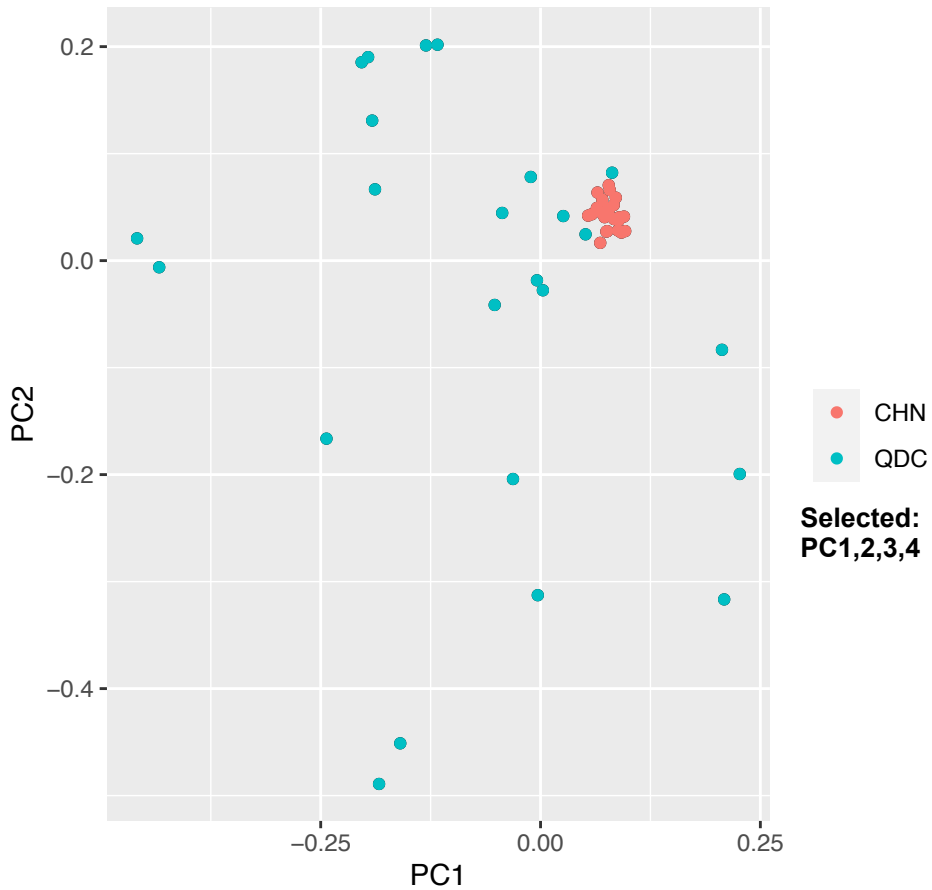

# Projection onto PC3 and PC4

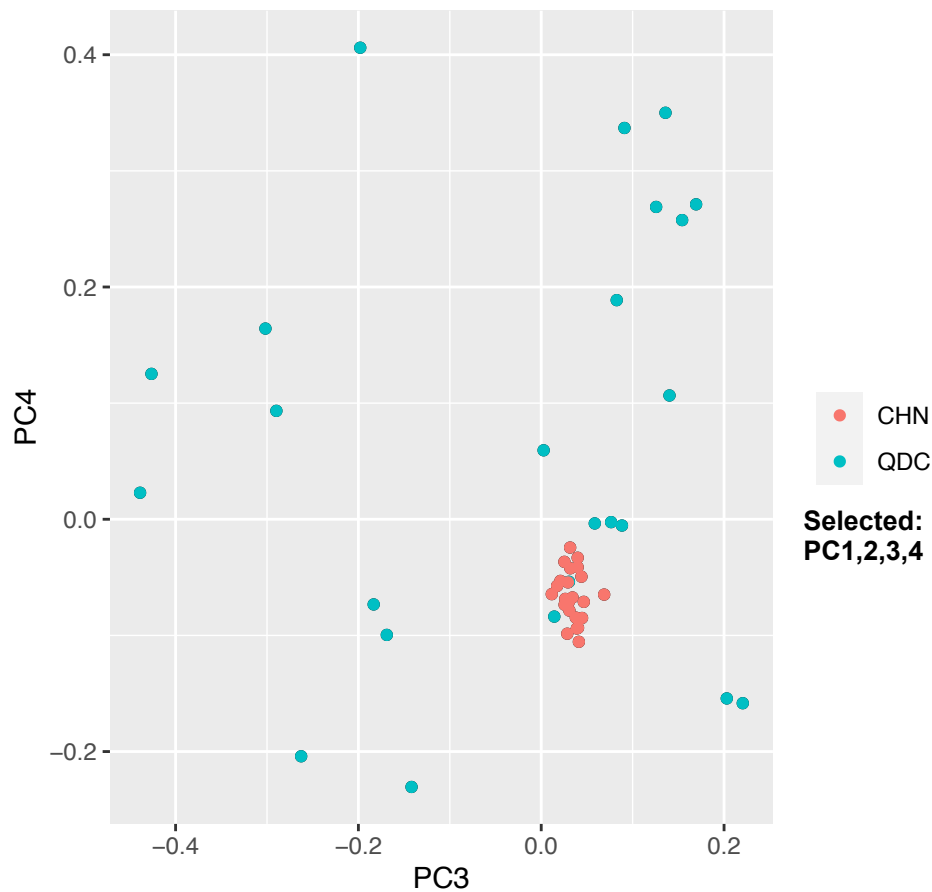



# Projection onto PC1 and PC2

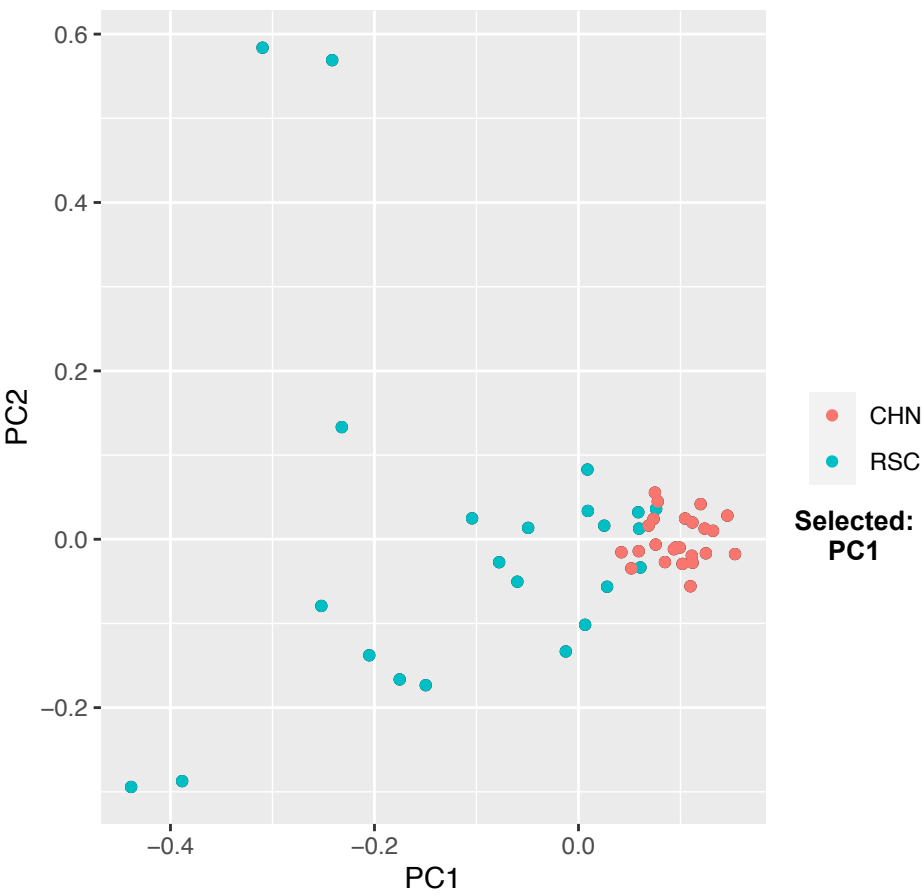



# Projection onto PC1 and PC2

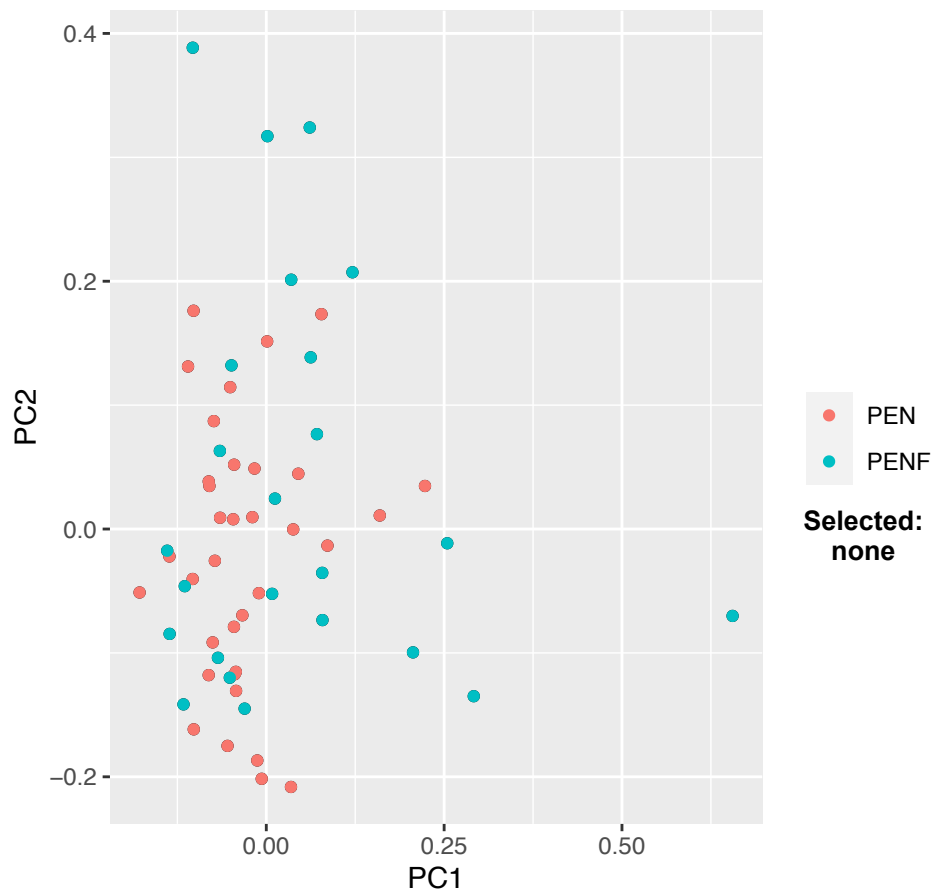

# Projection onto PC1 and PC2

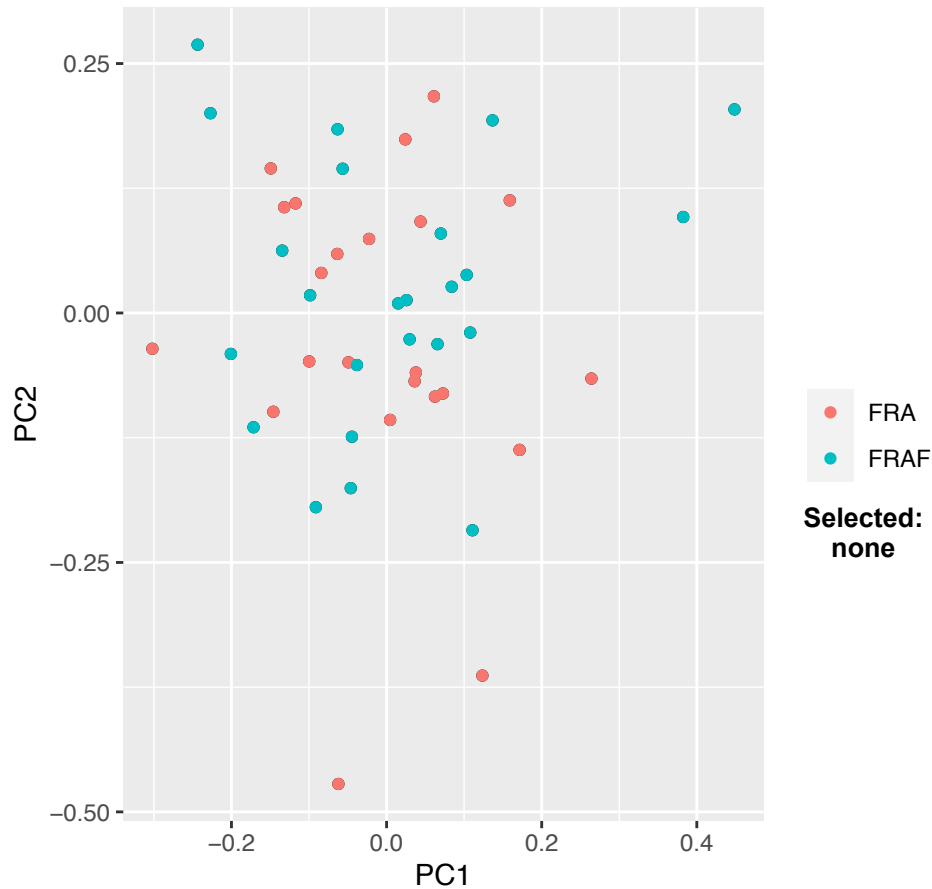

# Projection onto PC1 and PC2

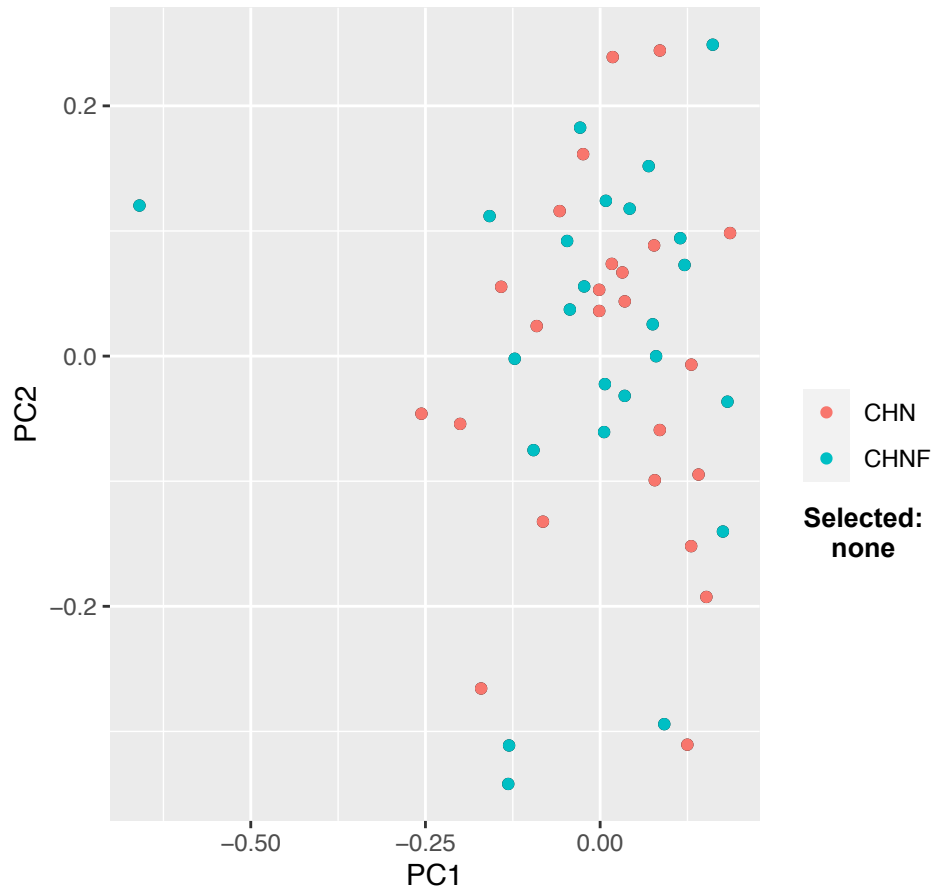

Supplement: EVA-13-1380-s003.pdf [file EVA-13-1380-s003.pdf]
