# Supplementary material for: Relative genomic impacts of translocation history, hatchery practices, and farm selection in Pacific oyster Crassostrea gigas throughout the Northern Hemisphere
Source: PubMed Central journal article supplement (PMC7359842; doi:10.1111/eva.12965), 2020-04-17

# Scree Plot – K = 20

**DPB-PEN**  
**K = 3**

Proportion of explained variance

0.10

0.08

0.06

0.04

0.02

5

10

15

20

PC

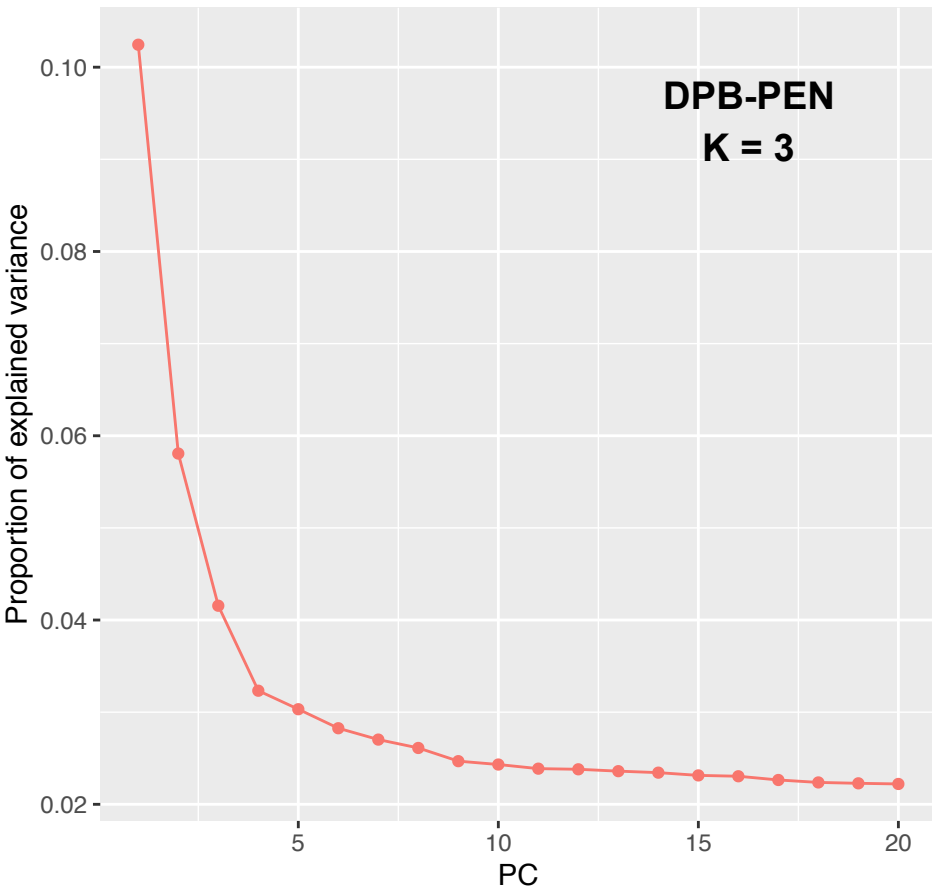

Scree Plot – K = 20

**ROS-PIP**  
**K = 5**

Proportion of explained variance

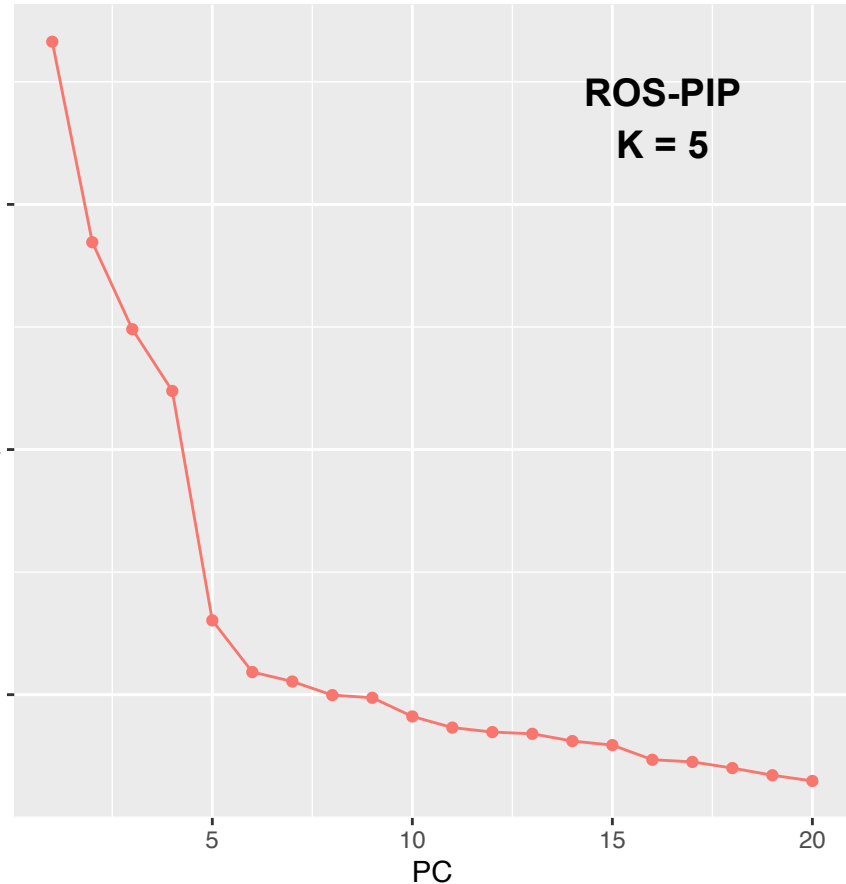

PC

Scree Plot – K = 20

**GUR-FRA**  
**K = 6**

Proportion of explained variance

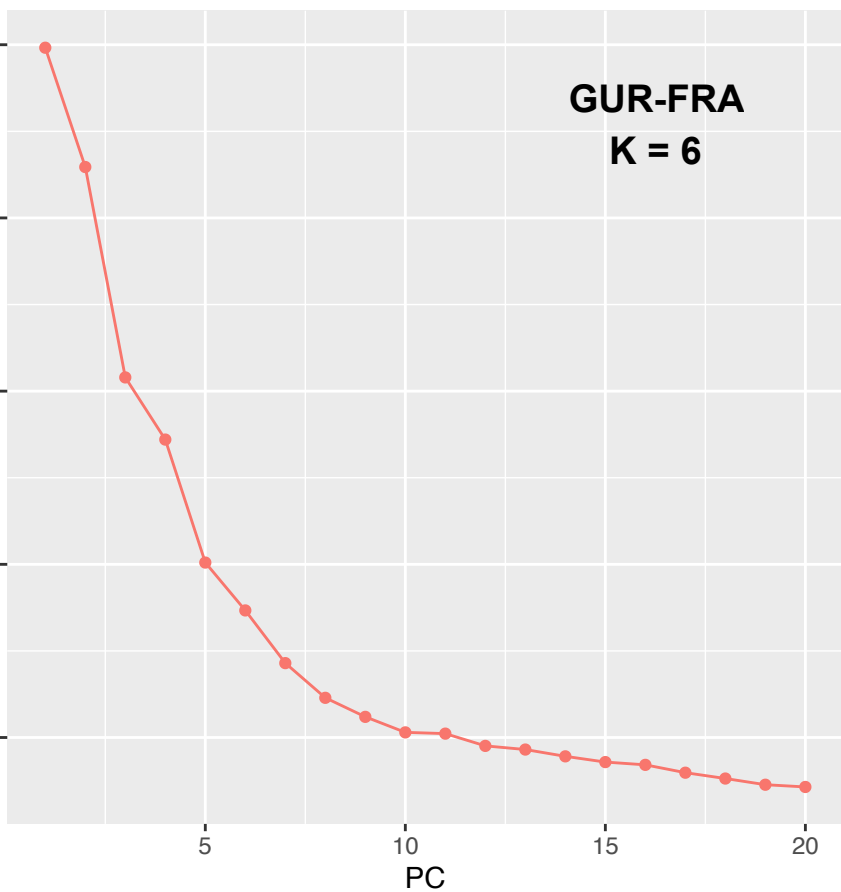

Scree Plot – K = 20

**QDC-CHN**  
**K = 6**

Proportion of explained variance

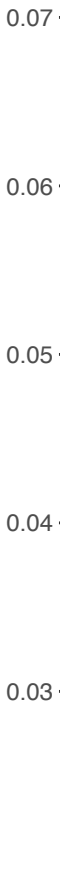

Scree Plot – K = 20

**RSC-CHN**  
**K = 3**

Proportion of explained variance

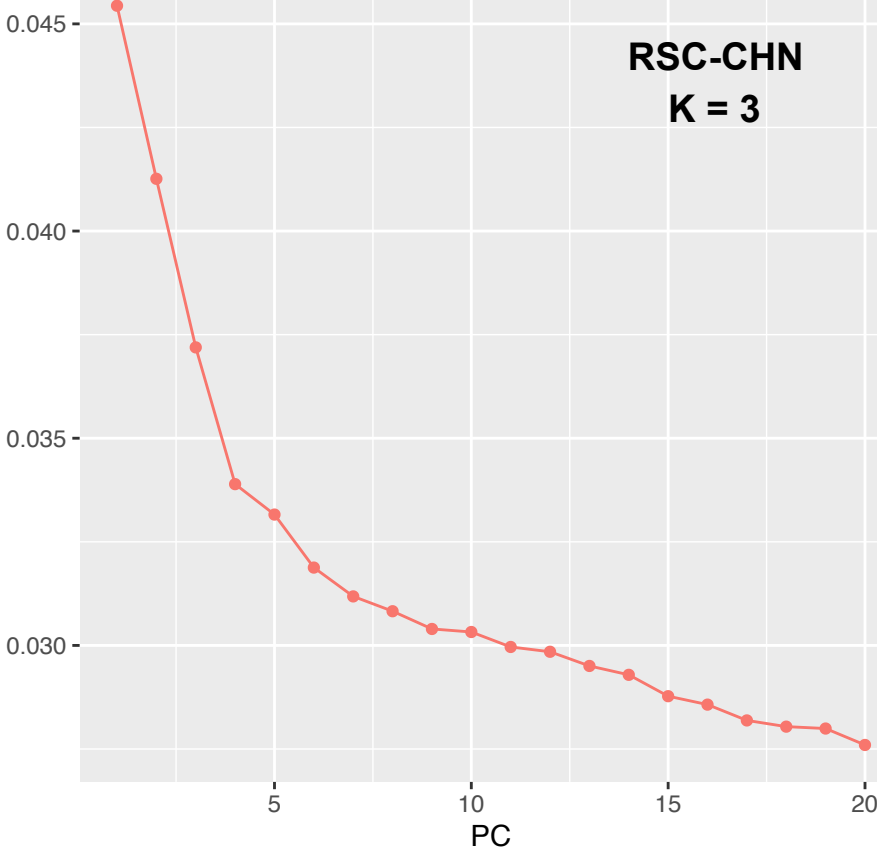

Scree Plot – K = 20

**PEN-PENF**  
**K = 1**

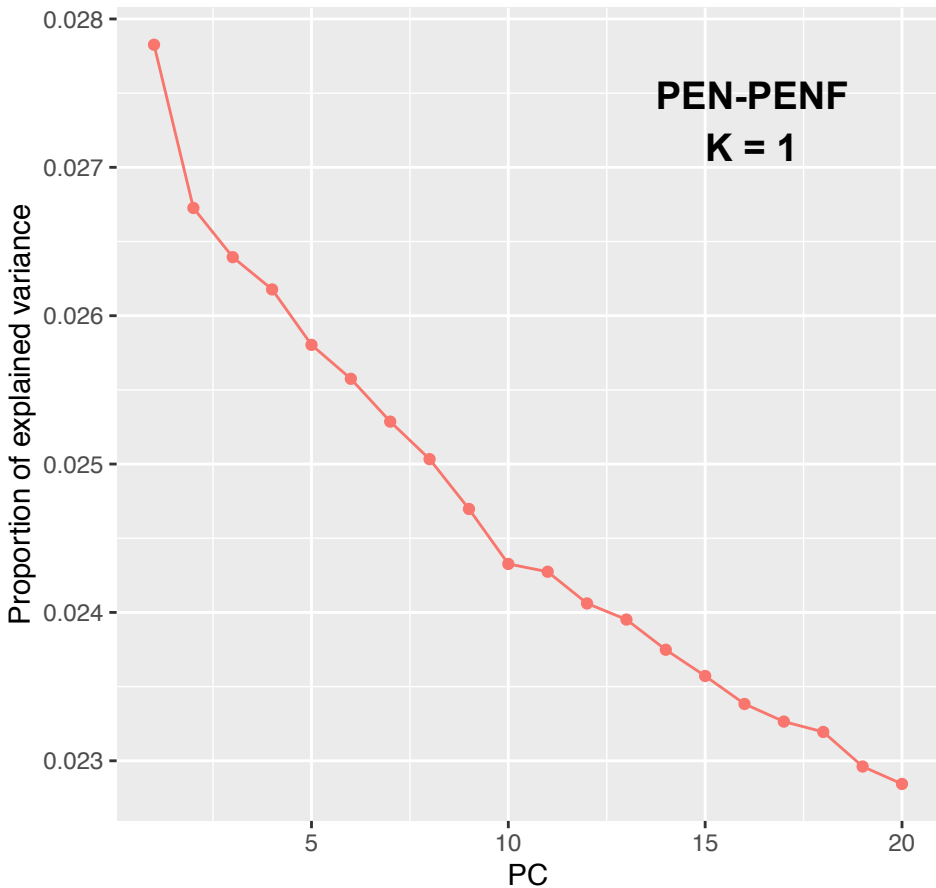

# Scree Plot – K = 20

**FRA-FRAF**  
**K = 1**

Proportion of explained variance

0.032

0.031

0.030

0.029

0.028

5

10

15

20

PC

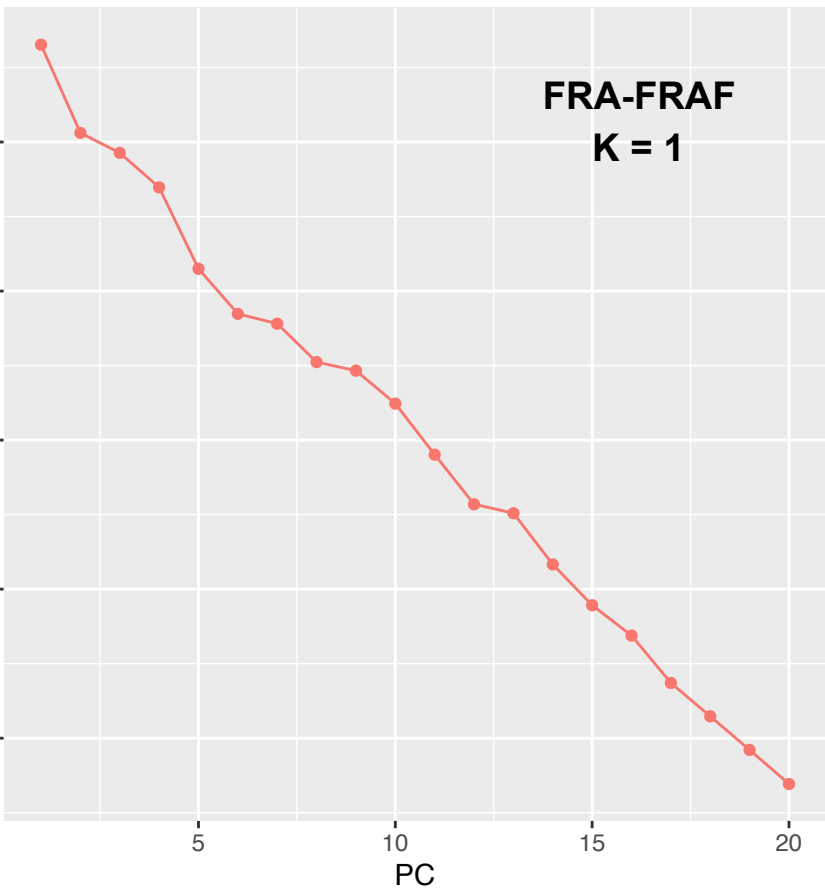

Scree Plot – K = 20

**CHN-CHNF**  
**K = 1**

Proportion of explained variance

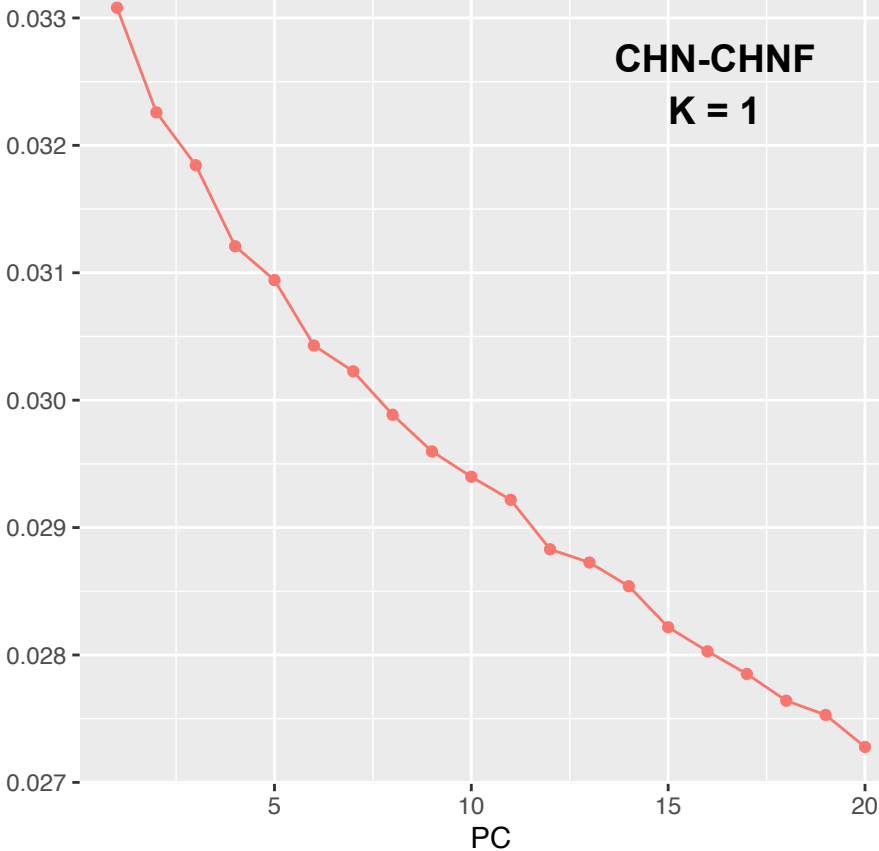

Supplement: EVA-13-1380-s002.pdf [file EVA-13-1380-s002.pdf]
